# Supplementary material
Source: MDPI journal article supplement (https://www.mdpi.com/2312-7481/7/4/49)
Supplement: s1 [file s1]

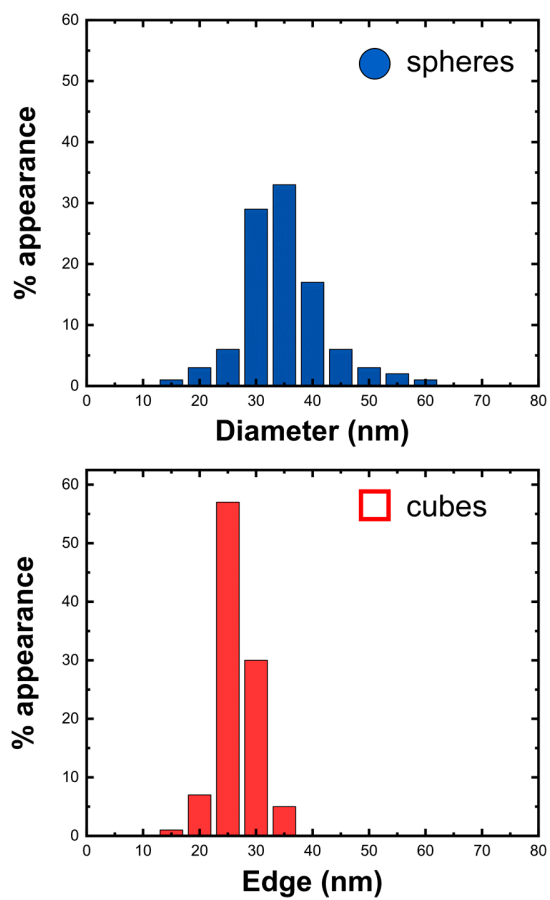

**Figure S1.** Size distribution of the diameter for spherical core-shell nanoparticles and the edge dimension for the cubic ones.
